# Supplementary material
Source: Springer Nature journal article supplement (https://www.springermedizin.de/resource/supplementary/12943_2013_1492_MOESM1_ESM.pdf/9553232)

## Supplementary Figure S1

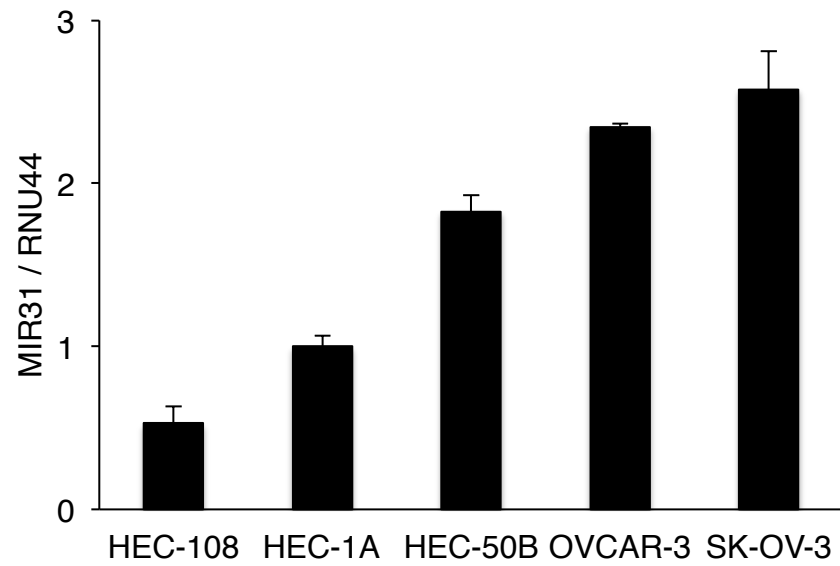

Supplement: MOESM1 [file 9553232]
